# Supplementary material for: UV-driven self-replenishing liquid-infused surface with promising anti-algal adhesion performance
Source: Royal Society of Chemistry journal article supplement (doi:10.1039/d4ra04077e), 2024-01-01
Supplement: d4ra04077e1.pdf [file d4ra04077e1.pdf]

## Supporting Information

# UV-driven self-replenishing liquid infused surface with promising anti-algae adhesion performance

Shuai Kong<sup>a,b,c</sup>, Hao Wei<sup>d</sup>, Yan Zhang<sup>a,c</sup>, Qingqing Rao<sup>e\*</sup>

<sup>a</sup>State Grid Shandong Electric Power Research Institute, Jinan 250003, China

<sup>b</sup>College of Chemical and Biochemical Engineering, Zhejiang University, Hangzhou  
310027, China

<sup>c</sup>Shandong Smart Grid Technology Innovation Center, Jinan 250002, China

<sup>d</sup>School of Life Sciences, Qufu Normal University, Qufu 273165, China

<sup>e</sup>College of Chemistry and Materials Engineering, Zhejiang A&F University,  
Hangzhou 311300, China

**\*Corresponding Author:**

E-mail: qqrao@zafu.edu.cn.

Table S1. Surface atomic composition of VO, MEMG@ED, SMEMG and R-SMEMG from XPS elemental analysis.

| Sample  | C (%) | O (%) | N (%) |
|---------|-------|-------|-------|
| VO      | 88.77 | 10.84 | 0.4   |
| MEMG@ED | 74.77 | 24.05 | 1.18  |
| SMEMG   | 80.04 | 18.97 | 0.99  |
| R-SMEMG | 79.44 | 19.53 | 1.03  |

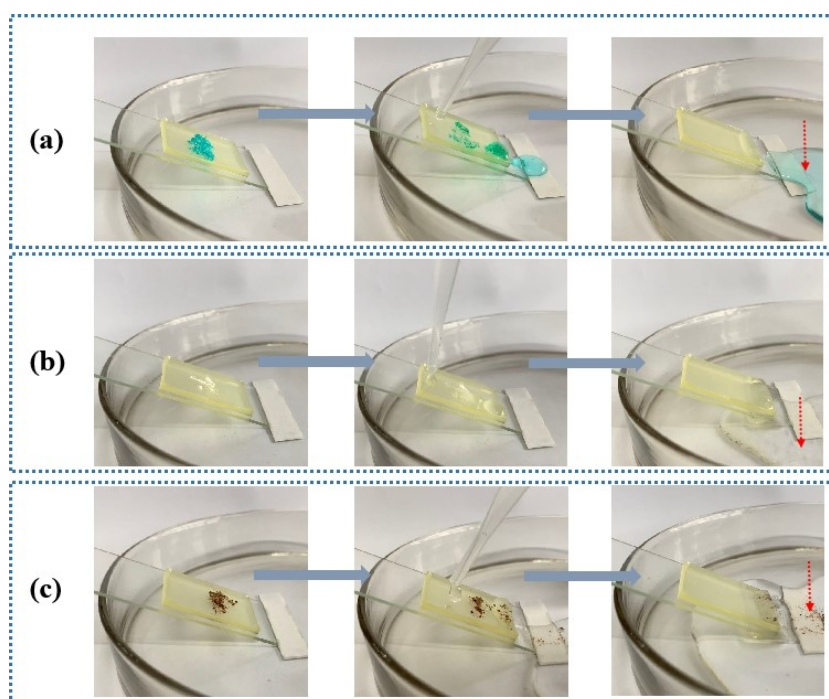

Figure S1. Self-cleaning test on SMEMG by employing  $\text{CuCl}_2 \cdot 2\text{H}_2\text{O}$  particles (a),  $\text{SiO}_2$  powders (b) and sandy soil (c) as the model contaminants.

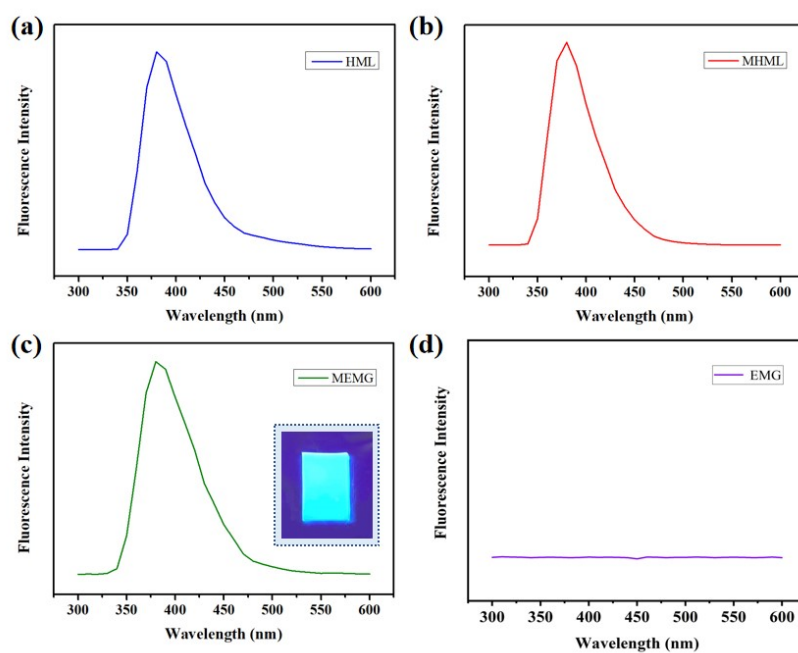

Figure S2. The fluorescence spectra of HML (a), MHML (b), MEMG (c) and EMG (d); the insert is the digital photographs of SMEMG under UV light irradiation with wavelength of 365 nm.

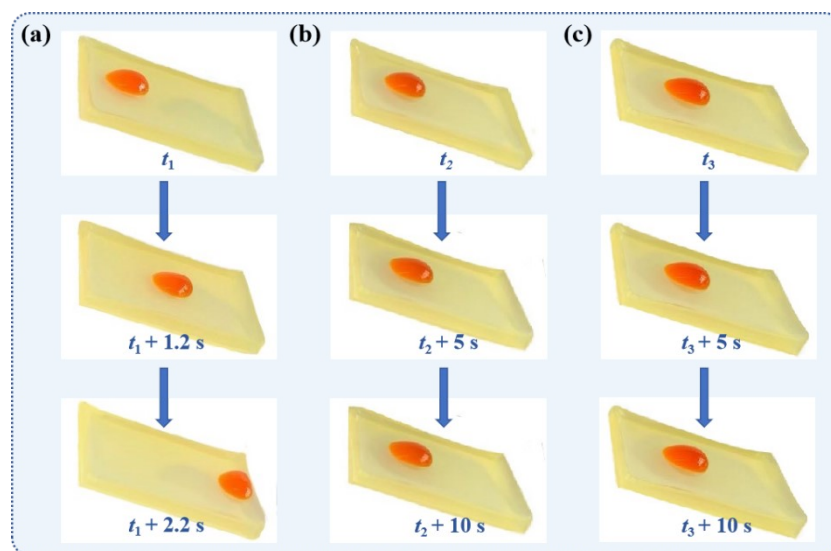

Figure S3. Dynamic control of water droplet (20  $\mu$ L) mobility on SEMG. (a) Process of water droplet slipping off SEMG at initial state; (b) process of water droplet pinned on SEMG after the surface lubricant oil is swabbed; (c) process of water droplet still stuck on SEMG after UV irradiation for 8 h.
